# Supplementary material for: Direct Synthesis of CuP2 and Cu3P and Their Performance as Electrocatalysts for Hydrogen Evolution, Oxygen Evolution, and Oxygen Reduction Reactions
Source: MDPI journal article supplement (doi:10.3390/solids5010010), 2024-03-07
Supplement: s1 [file s1]

## Supplementary Materials

# Direct Synthesis of $\text{CuP}_2$ and $\text{Cu}_3\text{P}$ and Their Performance as Electrocatalysts for Hydrogen Evolution, Oxygen Evolution, and Oxygen Reduction Reactions

Xiao Ma <sup>1,2,3</sup>, Xueni Huang <sup>4</sup> and Abdessadek Lachgar <sup>1,2,3,\*</sup>

<sup>1</sup> Department of Chemistry, Wake Forest University, Winston-Salem, NC 27109, USA.

<sup>2</sup> Center for Energy, Environment and Sustainability (CEES), Wake Forest University, Winston-Salem, NC 27109, USA

<sup>3</sup> Center for Functional Materials (CFM), Wake Forest University, Winston-Salem, NC 27109, USA

<sup>4</sup> Department of Chemistry, University of Connecticut, Storrs, CT 06269, USA.

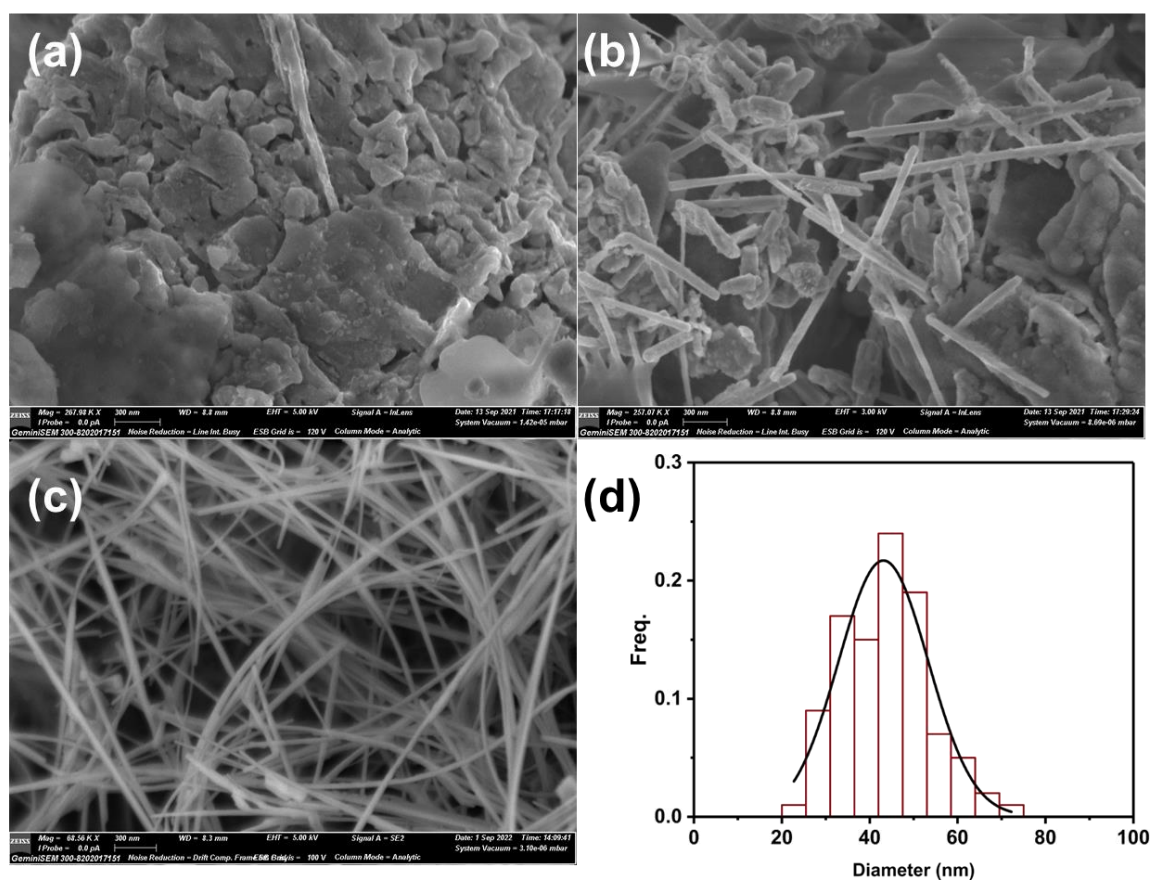

**Figure S1.** SEM results of morphology differences by increasing TOPO/ODE ratio at the same temperature for  $\text{CuP}_2$  synthesis, specifically, 10% for (a), 30% for (b) and 50% for (c). (d) Corresponding diameter distribution histogram of  $\text{CuP}_2$  of (c).

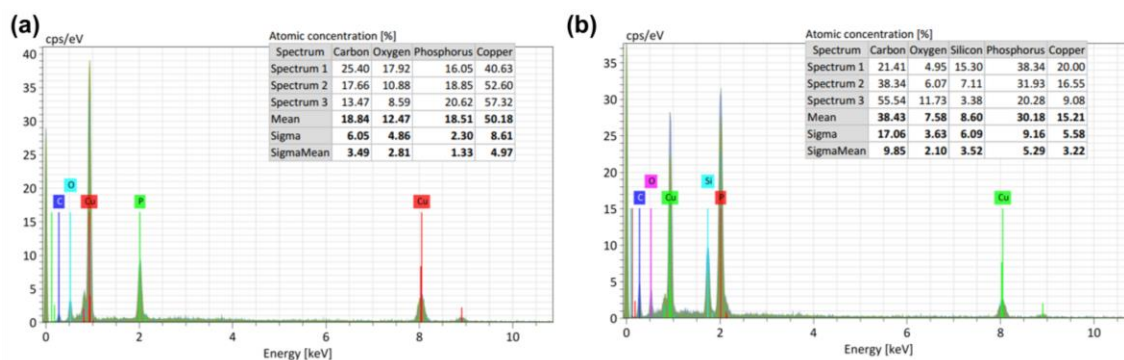

**Figure S2.** Typical EDS results for (a) Cu<sub>3</sub>P and (b) CuP<sub>2</sub>.

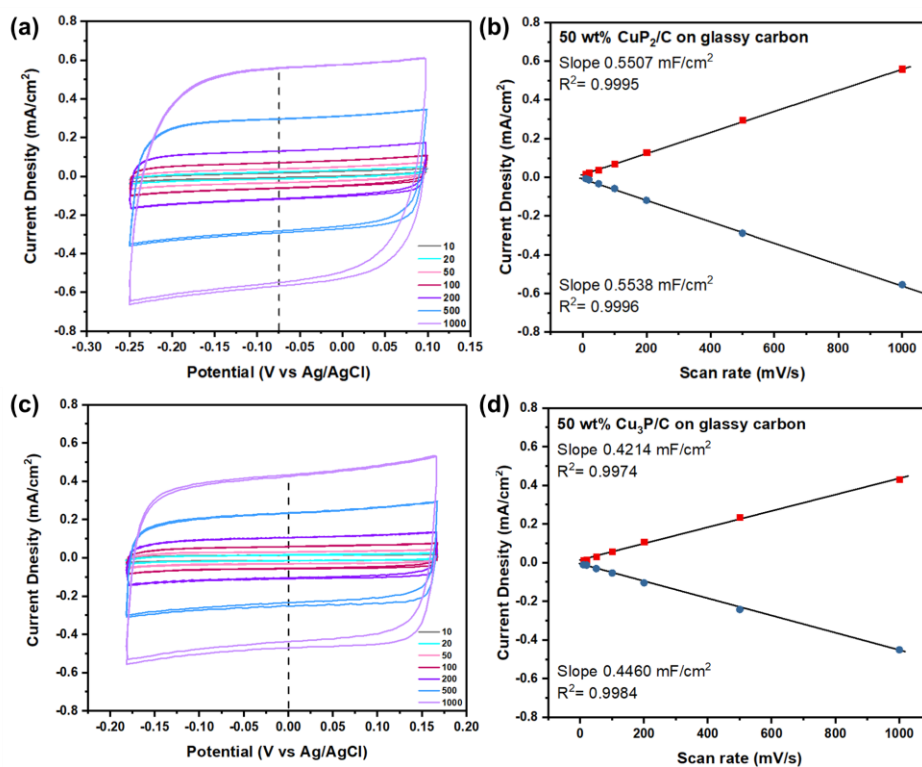

**Figure S3.** ECSA comparison of (a, b) 50 wt % CuP<sub>2</sub>/C and (b) 50 wt % Cu<sub>3</sub>P/C on glassy carbon in 0.1 M NaOH.

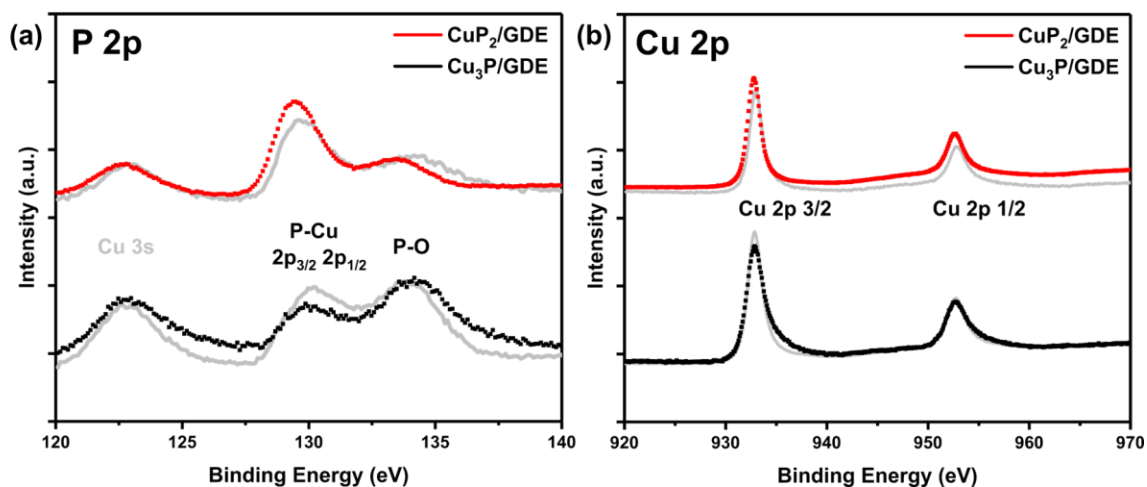

**Figure S4.** XPS results for  $\text{CuP}_2$  and  $\text{Cu}_3\text{P}$  on gas diffusion electrode after scanned between 0.4 and 0.8 V vs. RHE for 1000 cycles, the results for pristine materials were shown in grey for easier comparison.

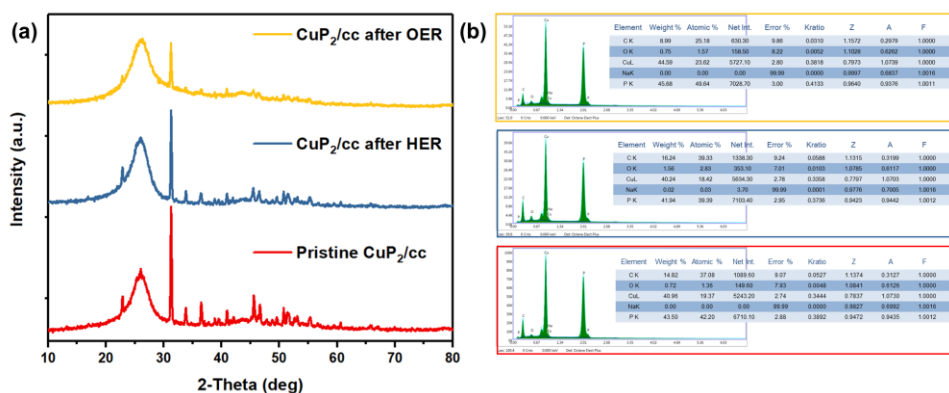

**Figure S5.** (a) XRD and (b) EDS results for  $\text{CuP}_2$  on carboncloth (cc) before HER, after HER and after ORR.
